# Supplementary material for: Transient behaviour of magnetic micro-bead chains rotating in a fluid by external fields
Source: Royal Society of Chemistry journal article supplement (doi:10.1039/b713735b), 2007-01-01
Supplement: b713735b.pdf [file b713735b.pdf]

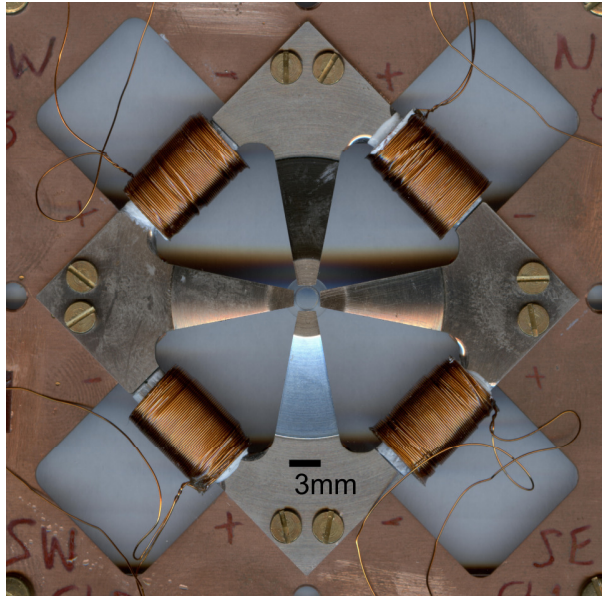

**Supplementary Figure:** The experimental setup used. It consists of 4 coils and 4 flux guides that concentrate the field in the area of the fluid. The fluid container lies in the centre between the 4 flux guides.
